# Supplementary material for: Rhodium-catalyzed approach to mannich-type products using aldimine, α,β-unsaturated ester, and hydrosilaneElectronic supplementary information (ESI) available: experimental details. See http://www.rsc.org/suppdata/cc/b2/b202773a/
Source: Royal Society of Chemistry journal article supplement (doi:10.1039/b202773a), 2002-05-16
Supplement: b202773a.doc [file b202773a.doc]

# Supplementary data

# Rhodium-Catalyzed Approach to Mannich-type Products Using Aldimine, ,-Unsaturated Ester, and Hydrosilane

Takako Muraoka, Shin-ichi Kamiya, Isamu Matsuda,* and Kenji Itoh

Department of Molecular Design and Engineering, Graduate School of Engineering, Nagoya University, Chikusa, Nagoya 464-8603, Japan

**General.** All reactions were carried out in a 20 ml three necked round bottom flask under argon atmosphere. Anhydrous solvents were transferred via an oven-dried syringe. The following solvents and reagents were distilled prior to use: CH2Cl2 and benzene from calcium hydride; tetrahydrofuran (THF) from sodium benzophenone ketyl. [Rh(cod)(PPh3)2]OTf,1 [Rh(cod)(PPh3)2]OTf,1 Rh4(CO)12,2 [Rh(dppe)Cl]2,3 **1a**,4 **1f**,4 **1g**,4 **1h**,4 **1i**,4 **1b**,5 **1c**,5 **1k**,6 **1d**,6 **1e**6 (EtOH was used as solvent), and **1j**7 were prepared according to the reported procedures. Methyl acrylate and diethylmethylsilane were purchased from Tokyo Kasei or Shin-etsu Chemicals. Those were used as received.

**Typical procedure for Mannich-type reactions catalyzed by Rhodium complex.**

To a CH2Cl2 (3 ml) solution of [Rh(cod){P(OPh)3}2]OTf (**4c**, 5.0 mg, 0.0051 mmol) was added a CH2Cl2 solution (2 ml) of benzylidene-4-methylbenzene-sulfonamide (**1a**, 129.8 mg, 0.50 mmol), methyl acrylate (**2**, 86.1 mg, 1.00 mmol) and Et2MeSiH (**3**, 102.1 mg, 1.00 mmol). The mixture was refluxed for 6 h to consume **1a** completely. After the reaction, volatiles were evaporated under reduced pressure. An EtOH (5 ml) solution of 1 M aqueous HCl was poured into the flask containing the residue. The resulting solution was stirred for 0.5 h at 25 °C and then was poured into a separating funnel containing a mixture of AcOEt (10 ml) and water (10 ml). Phases were separated and the aqueous layer was extracted with AcOEt (10 ml 3). The organic layer combined with AcOEt extracts was washed with aqueous NaHCO3 solution and brine, and then dried over magnesium sulfate. Volatiles were evaporated under reduced pressure and the residue was purified by flash column chromatography (eluent; hexane/AcOEt = 4/1) to give **6a** (175.6 mg, 0.47 mmol, *syn*/*anti* = 32/68) in 96% yield as a colorless solid. Recrystallization from hexane and ethyl acetate gave colorless needles.

**Property of 6a**; Colorless needles from AcOEt/hexane, mp; 112.0–113.0 ˚C, eluent: hexane/AcOEt = 4/1. IR (CHCl3): 3367 (N-H), 1726 (C=O) cm–1. For *syn* isomer; 1H NMR (300 MHz, CDCl3): 1.14 (d, *J* = 7.1 Hz, 3 H, C*H3*), 2.33 (s, 3H, Ar-C*H3*), 2.86 (dq, *J* = 7.1 and 6.8 Hz, 1 H, CH3C*H*), 3.48 (s, 3H, OC*H3*), 4.53 (dd, *J* = 9.0 and 6.8 Hz, 1 H, ArNHC*H*), 5.60 (d, *J*= 9.0 Hz, 1H, ArN*H*), 6.96–7.14 (m, 7H, Ar), 7.48–7.52 (m, 2H, Ar). 13C NMR (75 MHz, CDCl3):  13.59 (*C*H3), 21.45 (Ar-*C*H3), 45.92 (CH3*C*H), 51.80 (O*C*H3), 59.85 (ArNH*C*H), 126.43 (Ar), 126.92 (Ar), 127.38 (Ar), 128.06 (Ar), 129.09 (Ar), 137.26 (Ar), 137.96 (Ar), 142.82 (Ar), 173.55 (*C*=O). For *anti* isomer; 1H NMR (300 MHz, CDCl3): 1.14 (d, *J* = 7.1 Hz, 3 H, C*H3*), 2.31 (s, 3H, Ar-C*H3*), 2.82 (dq, *J* = 7.1 and 6.6 Hz, 1 H, CH3C*H*), 3.55 (s, 3H, OC*H3*), 4.50 (dd, *J* = 9.0 and 6.6 Hz, 1 H, ArNHC*H*), 5.92 (d, *J* = 9.0 Hz, 1H, ArN*H*), 6.96–7.14 (m, 7H, Ar), 7.48–7.52 (m, 2H, Ar). 13C NMR (75 MHz, CDCl3):  15.42 (*C*H3), 21.45 (Ar-*C*H3), 46.09 (CH3*C*H), 51.93 (O*C*H3), 60.22 (ArNH***C***H), 126.43 (Ar), 126.79 (Ar), 127.30 (Ar), 128.19 (Ar), 129.00 (Ar), 137.63 (Ar), 138.63 (Ar), 142.63 (Ar), 174.68 (*C*=O). Anal. Calcd for C18H21NO4S: C, 62.23; H, 6.09; N, 4.03. Found: C, 62.16; H, 6.16; N, 4.01%

.

*Syn*-Structure of **6a** was confirmed by the comparison of the 1H and 13C NMR spectra with the authentic sample prepared by the following two step procedure starting from *anti*-methyl 3-hyfroxy-2-methyl-3-phenylpropanoate, because **6a** could not be converted to the corresponding -lactam; (i) substitution of the hydroxy group to N-*p*-toluenesulfonyl-N-*tert*-butyloxycarbonylamino group by the interaction of diethyl azodicarboxylate/PPh3/THF and ii) the N-*tert*-butyloxycarbonyl group of the product obtained in the previous step was removed by heating in DMSO for 20 min at 175 °C.

**Property of 6b**; Colorless needles from AcOEt/hexane, mp; 139.4–139.8 ˚C, eluent: hexane/AcOEt = 10/1. IR (CHCl3): 3421 (N-H), 1729 (C=O) cm–1. For *syn* isomer; 1H NMR (300 MHz, CDCl3): 1.16 (d, *J* = 6.9 Hz, 3 H, C*H3*), 2.99 (dq, *J* = 7.1 and 5.0 Hz, 1 H, CH3C*H*), 3.62 (s, 3H, OC*H3*), 4.66 (d, *J* = 5.0 Hz, 1 H, ArNHC*H*), 6.44–6.51 (m, 2H, Ar), 6.99–7.04 (m, 2H, Ar), 7.22–7.34 (m, 5H, Ar). 13C NMR (75 MHz, CDCl3):  11.98 (*C*H3), 45.83 (CH3*C*H), 51.99 (O*C*H3), 59.91 (ArNH*C*H), 114.88 (Ar), 122.41 (Ar), 126.73 (Ar), 127.44 (Ar), 128.45 (Ar), 128.76 (Ar), 139.70 (Ar), 145.08 (Ar), 174.25 (*C*=O). For *anti* isomer; 1H NMR (300 MHz, CDCl3): 1.17 (d, *J* = 7.1 Hz, 3 H, C*H3*), 2.90 (dq, *J* = 7.2 and 7.1 Hz, 1 H, CH3C*H*), 3.63 (s, 3H, OC*H3*), 4.45 (d, *J* = 7.2 Hz, 1 H, ArNHC*H*), 6.44–6.51 (m, 2H, Ar), 6.99–7.04 (m, 2H, Ar), 7.22–7.34 (m, 5H, Ar). 13C NMR (75 MHz, CDCl3):  15.49 (*C*H3), 46.51 (CH3*C*H), 51.93 (O*C*H3), 60.98 (ArNH*C*H), 114.72 (Ar), 122.21 (Ar), 126.65 (Ar), 127.55 (Ar), 128.55 (Ar), 128.79 (Ar), 140.32 (Ar), 145.00 (Ar), 175.17 (*C*=O). Anal. Calcd for C17H18ClNO2: C, 67.21; H, 5.97; N, 4.61. Found: C, 66.96; H, 5.85; N, 4.66%.

**Property of 6c**; Colorless needles from AcOEt/hexane, mp; 88.0–89.2 ˚C, eluent hexane/AcOEt = 10/1. IR (CHCl3): 3413 (N-H), 1727 (C=O) cm–1. For *syn* isomer; 1H NMR (300 MHz, CDCl3): 1.18 (d, *J* = 7.2 Hz, 3 H, C*H3*), 2.98 (dq, *J* = 7.2 and 5.4 Hz, 1 H, CH3C*H*), 3.63 (s, 3H, OC*H3*), 4.73 (d, *J* = 5.4 Hz, 1 H, ArNHC*H*), 6.52–6.68 (m, 3H, Ar), 7.05–7.32 (m, 7H, Ar). 13C NMR (75 MHz, CDCl3):  15.42 (*C*H3), 46.64 (CH3*C*H), 51.93 (O*C*H3), 60.75 (ArNH*C*H), 113.56 (Ar), 117.52 (Ar), 126.71 (Ar), 127.36 (Ar), 128.46 (Ar), 128.93 (Ar), 140.87 (Ar), 146.52 (Ar), 174.39 (*C*=O). For *anti* isomer; 1H NMR (300 MHz, CDCl3): 1.17 (d, *J* = 7.2 Hz, 3 H, C*H3*), 2.89 (dq, *J* = 7.3 and 7.2 Hz, 1 H, CH3C*H*), 3.62 (s, 3H, OC*H3*), 4.51 (d, *J* = 7.3 Hz, 1 H, ArNHC*H*), 6.52–6.68 (m, 3H, Ar), 7.05–7.32 (m, 7H, Ar). 13C NMR (75 MHz, CDCl3):  11.98 (*C*H3), 46.05 (CH3*C*H), 51.87 (O*C*H3), 59.67 (ArNH*C*H), 113.65 (Ar), 117.61 (Ar), 126.75 (Ar), 127.24 (Ar), 128.37 (Ar), 128.95 (Ar), 140.37 (Ar), 146.68 (Ar), 174.39 (*C*=O). Anal. Calcd for C17H19NO2: C, 75.81; H, 7.11; N, 5.20. Found: C, 75.76; H, 7.18; N, 5.17%.

Diastereochemical assignment is based on the coupling constant between the two ring protons on the -lactam derived from **6c**: *syn*-**6c** formed *cis*-disubstituted -lactam (*J* = 5.7 Hz) and *anti*-**6c** was converted to the *trans* isomer (*J* = 2.4 Hz).

**Property of 6d**; Colorless needles from AcOEt/hexane, eluent: hexane/AcOEt = 10/1. IR (CHCl3): 3416 (N-H), 1728 (C=O) cm–1. For *syn* isomer; 1H NMR (300 MHz, CDCl3): 1.16 (d, *J* = 7.2 Hz, 3 H, C*H3*), 2.96 (dq, *J* = 7.2 and 5.2 Hz, 1 H, CH3C*H*), 3.62 (s, 3H, OC*H3*), 3.68 (s, 3H, OC*H3*), 4.65 (d, *J* = 5.2 Hz, 1 H, ArNHC*H*), 6.46–6.54 (m, 2H, Ar), 6.64–6.70 (m, 2H, Ar), 7.20–7.33 (m, 5H, Ar). 13C NMR (75 MHz, CDCl3):  15.33 (*C*H3), 46.05 (CH3*C*H), 51.88 (O*C*H3), 55.67 (O*C*H3), 60.59 (ArNH*C*H), 114.55 (Ar), 115.01 (Ar), 126.81 (Ar), 127.19 (Ar), 128.44 (Ar), 140.53 (Ar), 152.05 (Ar), 174.52 (*C*=O). For *anti* isomer; 1H NMR (300 MHz, CDCl3): 1.14 (d, *J* = 7.2 Hz, 3 H, C*H3*), 2.86 (dq, *J* = 7.7 and 7.2 Hz, 1 H, CH3C*H*), 3.65 (s, 3H, OC*H3*), 3.68 (s, 3H, OC*H3*), 4.43 (d, *J* = 7.7 Hz, 1 H, ArNHC*H*), 6.46–6.54 (m, 2H, Ar), 6.64–6.70 (m, 2H, Ar), 7.20–7.33 (m, 5H, Ar). 13C NMR (75 MHz, CDCl3):  11.97 (*C*H3), 46.66 (CH3*C*H), 51.90 (O*C*H3), 55.67 (O*C*H3), 61.95 (ArNH*C*H), 114.57 (Ar), 115.15 (Ar), 126.81 (Ar), 127.35 (Ar), 128.33 (Ar), 140.53 (Ar), 152.05 (Ar), 175.32 (*C*=O).

**Property of 6e**; Colorless needles from AcOEt/hexane, mp; 127.8–129.3 ˚C eluent hexane/AcOEt = 13/1. For *syn* isomer; 1H NMR (300 MHz, CDCl3): 1.22 (d, *J* = 7.2 Hz, 3 H, C*H3*), 2.84–3.05 (m, 1 H, CH3C*H*), 3.61 (s, 3H, OC*H3*), 3.89 (Ar-OC*H3*), 4.75 (d, *J* = 5.4 Hz, 1 H, ArNHC*H*), 6.36–6.39 (m, 1H, ArN*H*), 6.58–6.78 (m, 3H, Ar), 7.22–7.32 (m, 6H, Ar). 13C NMR (75 MHz, CDCl3):  12.25 (*C*H3), 46.56 (CH3*C*H), 51.82 (O*C*H3), 55.59 (O*C*H3), 60.71 (ArNH*C*H), 109.34 (Ar), 111.24 (Ar), 116.72 (Ar), 120.93 (Ar), 126.72 (Ar), 127.14 (Ar), 128.27 (Ar), 136.27 (Ar), 140.81 (Ar), 146.86 (Ar), 174.25 (*C*=O). For *anti* isomer; 1H NMR (300 MHz, CDCl3): 1.15 (d, *J* = 6.9 Hz, 3 H, C*H***3**), 2.84–3.05 (m, 1 H, CH3C*H*), 3.67 (s, 3H, OC*H3*), 3.88 (Ar-OC*H3*), 4.32 (d, *J* = 7.8 Hz, 1 H, ArNHC*H*), 6.43-6.46 (m, 1H, ArN*H*), 6.58-6.78 (m, 3H, Ar), 7.22-7.32 (m, 6H, Ar). 13C NMR (75 MHz, CDCl3):  15.14 (*C*H3), 46.43 (CH3*C*H), 51.82 (O*C*H3), 55.59 (O*C*H3), 59.57 (ArNH*C*H), 109.41 (Ar), 111.24 (Ar), 116.72 (Ar), 120.93 (Ar), 126.86 (Ar), 127.32 (Ar), 128.37 (Ar), 136.47 (Ar), 140.63 (Ar), 146.79 (Ar), 175.12 (*C*=O). Anal. Calcd for C18H21NO3: C, 72.22; H, 7.07; N, 4.68. Found: C, 72.40; H, 7.04; N, 4.61%.

**Property of 6f**; Colorless needles from AcOEt/hexane, mp; 112.9–113.8 ˚C, eluent: hexane/AcOEt = 4/1. IR (CHCl3): 3366 (N-H), 1724 (C=O) cm–1. For *syn* isomer; 1H NMR (300 MHz, CDCl3): 1.12 (d, *J* = 7.1 Hz, 3 H, C*H3*), 2.36 (s, 3H, Ar-C*H3*), 2.84 (dq, *J* = 7.1 and 6.4 Hz, 1 H, CH3C*H*), 3.50 (s, 3H, OC*H***3**), 4.47 (dd, *J* = 8.7 and 6.4 Hz, 1 H, ArNHC*H*), 5.66 (d, *J* = 8.7 Hz, 1H, ArN*H*), 6.91–6.96 (m, 2H, Ar), 7.07-7.12 (m, 4H, Ar), 7.47–7.50 (m, 2H, Ar). 13C NMR (75 MHz, CDCl3):  13.67 (*C*H3), 21.47 (Ar-*C*H3), 45.69 (CH3*C*H), 51.93 (O*C*H3), 59.29 (ArNH*C*H), 126.90 (Ar), 128.19 (Ar), 128.38 (Ar), 129.18 (Ar), 133.30 (Ar), 136.48 (Ar), 137.48 (Ar), 143.17 (Ar), 173.38 (*C*=O). For *anti* isomer; 1H NMR (300 MHz, CDCl3): 1.16 (d, *J* = 7.2 Hz, 3 H, C*H3*), 2.35 (s, 3H, Ar-C*H3*), 2.78 (dq, *J* = 7.2 and 6.2 Hz, 1 H, CH3C*H*), 3.56 (s, 3H, OC*H3*), 4.50 (dd, *J* = 8.2 and 6.2 Hz, 1 H, ArNHC*H*), 5.98 (d, *J* = 8.2 Hz, 1H, ArN*H*), 6.91-6.96 (m, 2H, Ar), 7.07–7.12 (m, 4H, Ar), 7.47–7.50 (m, 2H, Ar). 13C NMR (75 MHz, CDCl3):  15.41 (*C*H3), 21.47 (Ar-*C*H3), 45.86 (CH3*C*H), 52.06 (O*C*H3), 59.63 (ArNH*C*H), 126.79 (Ar), 127.94 (Ar), 128.32 (Ar), 129.10 (Ar), 133.20 (Ar), 137.10 (Ar), 137.20 (Ar), 143.00 (Ar), 174.53 (*C*=O). Anal. Calcd for C18H20ClNO4S: C, 56.61; H, 5.28; N, 3.67. Found: C, 56.54; H, 5.41; N, 3.38%.

**Property of 6g**; Colorless needles from AcOEt/hexane, mp; 136.6–137.0 ˚C, eluent: hexane/AcOEt = 3/1. IR (CHCl3): 3367 (N-H), 1731 (C=O) cm–1. For *syn* isomer; 1H NMR (300 MHz, CDCl3): 1.14 (d, *J* = 7.2 Hz, 3 H, C*H3*), 2.34 (s, 3H, Ar-C*H3*), 2.74-2.88 (m, 1 H, CH3C*H*), 3.49 (s, 3H, OC*H3*), 3.73 (s, 3H, Ar-OC*H3*), 4.46 (dd, *J* = 8.8 and 6.5 Hz, 1 H, ArNHC*H*), 5.58 (d, *J* = 8.8 Hz, 1H, ArN*H*), 6.61–6.66 (m, 2H, Ar), 6.86–6.93 (m, 2H, Ar), 7.06–7.11 (m, 2H, Ar), 7.47-7.52 (m, 2H, Ar). 13C NMR (75 MHz, CDCl3):  15.36 (*C*H3), 21.47 (Ar-*C*H3), 45.95 (CH3*C*H), 51.82 (O*C*H3), 55.20 (Ar-O*C*H3), 59.42 (ArNH*C*H), 113.46 (Ar), 126.96 (Ar), 127.62 (Ar), 129.11 (Ar), 130.09 (Ar), 137.73 (Ar), 142.76 (Ar), 158.75 (Ar) 173.68 (*C*=O). For *anti* isomer; 1H NMR (300 MHz, CDCl3): 1.12 (d, *J* = 6.6 Hz, 3 H, C*H3*), 2.33 (s, 3H, Ar-C*H3*), 2.74-2.88 (m, 1 H, CH3C*H*), 3.57 (s, 3H, OC*H3*), 3.73 (s, 3H, Ar-OC*H3*), 4.45 (dd, *J* = 9.2 and 6.3 Hz, 1 H, ArNHC*H*), 5.84 (d, *J* = 9.2 Hz, 1H, ArN*H*), 6.61–6.66 (m, 2H, Ar), 6.86-6.93 (m, 2H, Ar), 7.06–7.11 (m, 2H, Ar), 7.47–7.52 (m, 2H, Ar). 13C NMR (75 MHz, CDCl3):  13.82 (*C*H3), 21.47 (Ar-*C*H3), 46.14 (CH3*C*H), 51.95 (O*C*H3), 55.22 (Ar-O*C*H3), 59.76 (ArNH*C*H), 113.59 (Ar), 126.84 (Ar), 128.01 (Ar), 129.01 (Ar), 130.78 (Ar), 137.38 (Ar), 142.58 (Ar), 158.69 (Ar) 174.79 (*C*=O). Anal. Calcd for C19H23NO5S: C, 60.46; H, 6.14; N, 3.71. Found: C, 60.33; H, 6.09; N, 3.89%.

**Property of 6h**; Colorless needles from AcOEt/hexane, mp; 105.5–107.5 ˚C, eluent: hexane/AcOEt = 3/1. IR (CHCl3): 3349 (N-H), 1732 (C=O) cm–1. For *syn* isomer; 1H NMR (300 MHz, CDCl3): 1.30 (d, *J* = 6.8 Hz, 3 H, C*H3*), 2.27 (s, 3H, Ar-C*H3*), 3.03 (dq, *J* = 9.9 and 6.8 Hz, 1 H, CH3C*H*), 3.35 (s, 3H, OC*H3*), 3.76 (s, 3H, Ar-OC*H3*), 4.39 (dd, *J* = 10.2 and 9.9 Hz, 1 H, ArNHC*H*), 5.78 (d, *J* = 10.2 Hz, 1H, ArN*H*), 6.60–6.86 (m, 3H, Ar), 6.96–7.11 (m, 3H, Ar), 7.41–7.45 (m, 2H, Ar). 13C NMR (75 MHz, CDCl3):  15.56 (*C*H3), 21.39 (Ar-*C*H3), 44.20 (CH3*C*H), 51.79 (O*C*H3), 55.26 (Ar-O*C*H3), 58.79 (ArNH*C*H), 110.50 (Ar), 120.11 (Ar), 125.40 (Ar), 126.65 (Ar), 128.67 (Ar), 128.73 (Ar), 129.92 (Ar), 137.15 (Ar), 142.54 (Ar), 155.87 (Ar), 174.02 (*C*=O). For *anti* isomer; 1H NMR (300 MHz, CDCl3): 0.97 (d, *J* = 7.2 Hz, 3 H, C*H3*), 2.28 (s, 3H, Ar-C*H3*), 3.00 (dq, *J* = 8.5 and 7.2 Hz, 1 H, CH3C*H*), 3.61 (s, 3H, OC*H3*), 3.75 (s, 3H, Ar-OC*H3*), 4.57 (dd, *J* = 10.5 and 8.5 Hz, 1 H, ArNHC*H*), 5.93 (d, *J*= 10.5 Hz, 1H, ArN*H*), 6.60–6.86 (m, 3H, Ar), 6.96–7.11 (m, 3H, Ar), 7.41-7.45 (m, 2H, Ar). 13C NMR (75 MHz, CDCl3):  14.85 (*C*H3), 21.39 (Ar-*C*H3), 44.80 (CH3*C*H), 51.41 (O*C*H3), 55.14 (Ar-O*C*H3), 59.80 (ArNH*C*H), 110.27 (Ar), 120.20 (Ar), 125.40 (Ar), 126.65 (Ar), 128.60 (Ar), 128.79 (Ar), 129.39 (Ar), 137.48 (Ar), 142.39 (Ar), 156.08 (Ar), 174.78 (*C*=O). Anal. Calcd for C19H23NO5S: C, 60.46; H, 6.14; N, 3.71. Found: C, 60.49; H, 6.30; N, 3.41%.

**Property of 6i**; Colorless needles from AcOEt/hexane, mp; 123.0–124.0 ˚C, eluent: hexane/AcOEt = 3/1. IR (CHCl3): 3586 (N-H), 3334 (OH) 1731 (C=O) cm–1. For *syn* isomer; 1H NMR (300 MHz, CDCl3): 1.35 (d, *J* = 7.1 Hz, 3 H, C*H3*), 2.27 (s, 3H, Ar-C*H3*), 3.16 (dq, *J* = 9.6 and 7.1 Hz, 1 H, CH3C*H*), 3.45 (s, 3H, OC*H3*), 4.44 (dd, *J*= 10.1 and 9.6 Hz, 1 H, ArNHC*H*), 6.06 (d, *J* = 10.1 Hz, 1H, ArN*H*), 6.51–6.74 (m, 3H, Ar), 6.90–7.02 (m, 3H, Ar), 7.46–7.50 (m, 2H, Ar). 13C NMR (75 MHz, CDCl3):  15.00 (*C*H3), 21.44 (Ar-*C*H3), 45.18 (CH3*C*H), 51.88 (O*C*H3), 59.88 (ArNH*C*H), 115.82 (Ar), 119.72 (Ar), 123.61 (Ar), 126.69 (Ar), 128.79 (Ar), 129.01 (Ar), 129.49 (Ar), 136.69 (Ar), 142.89 (Ar), 153.03 (Ar), 175.22 (*C*=O). For *anti* isomer; 1H NMR (300 MHz, CDCl3): 0.98 (d, *J* = 7.2 Hz, 3 H, C*H3*), 2.28 (s, 3H, Ar-C*H3*), 3.11 (dq, *J* = 9.8 and 7.2 Hz, 1 H, CH3C*H*), 3.70 (s, 3H, OC*H3*), 4.36 (dd, *J* = 10.1 and 9.8 Hz, 1 H, ArNHC*H*), 6.17 (d, *J* = 10.1 Hz, 1H, ArN*H*), 6.51–6.74 (m, 3H, Ar), 6.90–7.02 (m, 3H, Ar), 7.46–7.50 (m, 2H, Ar). 13C NMR (75 MHz, CDCl3):  15.29 (*C*H3), 21.44 (Ar-*C*H3), 44.54 (CH3*C*H), 52.33 (O*C*H3), 59.88 (ArNH*C*H), 115.77 (Ar), 119.76 (Ar), 123.16 (Ar), 126.69 (Ar), 128.76 (Ar), 128.96 (Ar), 129.73 (Ar), 136.82 (Ar), 142.83 (Ar), 152.91 (Ar), 176.06 (*C*=O). Anal. Calcd for C18H21NO5S: C, 59.42; H, 5.82; N, 3.85. Found: C, 59.14; H, 5.76; N, 4.03%.

**Property of 6j**; Colorless needles from AcOEt/hexane, mp; 120.0–120.5 ˚C, eluent: hexane/AcOEt = 3/1. IR (CHCl3): 3364 (N-H), 1724 (C=O) cm–1. For *syn* isomer; 1H NMR (300 MHz, CDCl3): 1.17 (d, *J* = 7.2 Hz, 3 H, C*H3*), 2.25 (s, 3H, Ar-C*H3*), 2.82 (dq, *J* = 7.2 and 4.7 Hz, 1 H, CH3C*H*), 3.65 (s, 3H, OC*H3*), 4.00–4.12 (m, 1 H, ArNHC*H*), 5.43 (d, *J* = 9.3 Hz, 1H, ArN*H*), 5.74 (dd, *J* = 15.8 and 7.5 Hz, 1H, PhC=C*H*), 6.16 (d, *J* = 15.8 Hz, 1H, PhC*H*=C), 7.03–7.08 (m, 2H, Ar), 7.14–7.27 (m, 5H, Ar), 7.69–7.72 (m, 2H, Ar). 13C NMR (75 MHz, CDCl3):  13.99 (*C*H3), 21.42 (Ar-*C*H3), 44.41 (CH3*C*H), 52.01 (O*C*H3), 58.62 (ArNH*C*H), 126.32 (Ar), 126.37 (Ar), 127.13 (Ar), 127.78 (Ar), 128.24 (Ar), 129.40 (Ar), 133.68 (Ar), 135.79 (Ar), 137.79 (Ar), 143.19 (Ar), 173.95 (*C*=O). For *anti* isomer; 1H NMR (300 MHz, CDCl3): 1.27 (d, *J* = 7.2 Hz, 3 H, C*H3*), 2.25 (s, 3H, Ar-C*H3*), 2.72 (dq, *J* = 7.2 and 4.7 Hz, 1 H, CH3C*H*), 3.65 (s, 3H, OC*H3*), 4.00-4.12 (m, 1 H, ArNHC*H*), 5.53 (d, *J* = 9.3 Hz, 1H, ArN*H*), 5.77 (dd, *J* = 16.1 and 8.4 Hz, 1H, PhC=C*H*), 6.17 (d, *J* = 16.1 Hz, 1H, PhC*H*=C), 7.03–7.08 (m, 2H, Ar), 7.14–7.27 (m, 5H, Ar), 7.69–7.72 (m, 2H, Ar). 13C NMR (75 MHz, CDCl3):  14.86 (*C*H3), 21.42 (Ar-*C*H3), 44.33 (CH3*C*H), 52.01 (O*C*H3), 58.41 (ArNH*C*H), 124.32 (Ar), 126.28 (Ar), 127.09 (Ar), 127.73 (Ar), 128.24 (Ar), 129.35 (Ar), 132.44 (Ar), 135.79 (Ar), 138.10 (Ar), 143.07 (Ar), 174.74 (*C*=O). Anal. Calcd for C20H23NO4S: C, 64.32; H, 6.21; N, 3.75. Found: C, 64.16; H, 6.17; N, 3.74%.

# References

1. Schrock, R. R.; Osborn, J. A. *J. Am. Chem. Soc.* **1971**, *93*, 2397.
2. Martinengo, S.; Giordano, G.; Chini, P. *Inorg. Synth.* **1990**, *28*, 242.
3. Fairlie, D. P.; Bosnich, B. *Organometallics*, **1988**, *7*, 936.
4. Love, B. E.; Raje, P. S.; Williams II, T. C. *Synlett*, **1994**, 493.
5. Tietze, L. F.; Bratz, M. *Synthesis*, **1989**, 439.
6. Bigelow, L. A.; Eatough, H. *Org. Synth.* **1941**, *Coll. Vol. 1*, 80.
7. Boger, D. L.; Corbett, W. L.; Curran, T. T.; Kasper, A. M. *J. Am. Chem. Soc.* **1991**, *113*, 1713.
8. (a) Syn Seerden, J. –P. G.; Scholte op Reimer, A. W. A.; Scheeren, H. W. *Tetrahedron Lett.* **1994**, *35*, 4419. (b) Soga, T.; Takenoshita, H.; Yamada, M.; Mukaiyama, T. *Bull. Chem. Soc. Jpn.* **1990**, *63*, 3122. (c) Mukaiyama, T.; Akamatsu, H.; Han, J. S. *Chem. Lett.* **1990**, 889. (d) Ojima, I.; Inaba, S.; Yoshida, K. *Tetrahedron Lett.* **1977**, 3643. (e) Luche, J. L.; Kagan, H. B.; *Bull. Soc. Chim. France* **1969**, 3500.
